# Supplementary material
Source: MDPI journal article supplement (https://www.mdpi.com/2073-4344/12/2/209)
Supplement: s1 [file s1]

## **Supplementary Material**

### **Photocatalytic Filtration of Zinc Oxide-Based Membrane with Enhanced Visible Light Responsiveness for Ibuprofen Removal**

**Nurafiqah Rosman <sup>1</sup>, Wan Norharyati Wan Salleh <sup>1\*</sup>, Juhana Jaafar <sup>1</sup>, Zawati Harun <sup>2</sup>, Farhana Aziz <sup>1</sup> and Ahmad Fauzi Ismail <sup>1</sup>**

<sup>1</sup> Advanced Membrane Technology Research Centre (AMTEC), School of Chemical and Energy Engineering, Universiti Teknologi Malaysia, Skudai 81310, Johor, Malaysia; afiqahrosman@gmail.com (N.R.); juhana@petroleum.utm.my (J.J.); farhana@petroleum.utm.my (F.A.); afauzi@utm.my (A.F.I.)

<sup>2</sup> Integrated Material and Process, Advanced Materials and Manufacturing Centre (AMMC), Faculty of Mechanical and Manufacturing Engineering, Universiti Tun Hussein Onn Malaysia, Parit Raja, Batu Pahat 86400, Johor Darul Takzim, Malaysia; zawati@uthm.edu.my

\* Correspondence: hayati@petroleum.utm.my

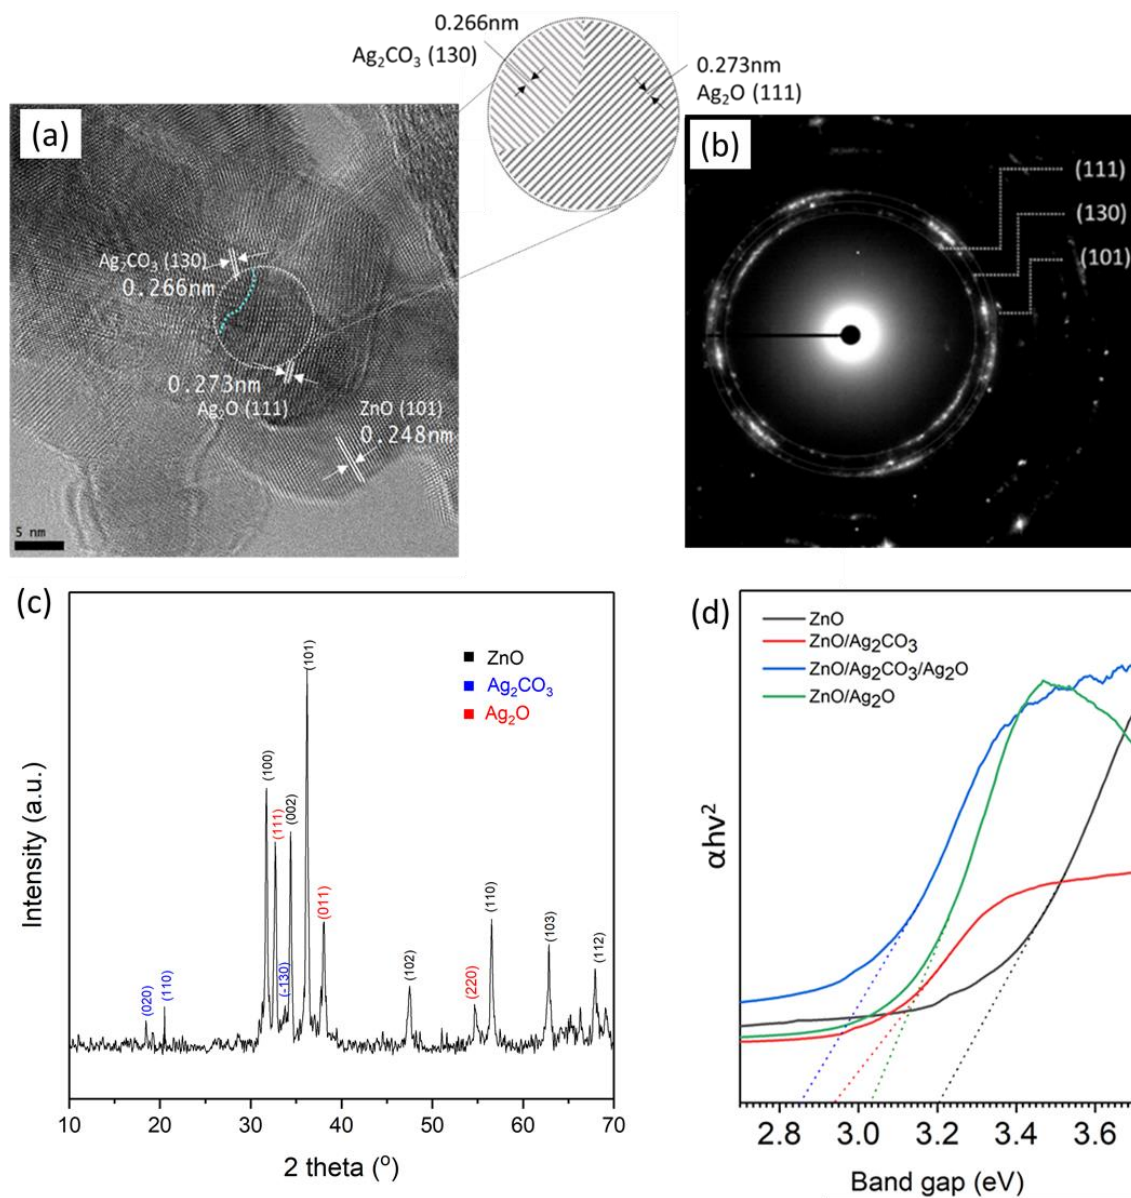

**Figure S1.** (a) TEM image; (b) SAED pattern; (c) XRD of ZnO/Ag<sub>2</sub>CO<sub>3</sub>/Ag<sub>2</sub>O photocatalyst; and (d) the band gaps value of prepared photocatalyst

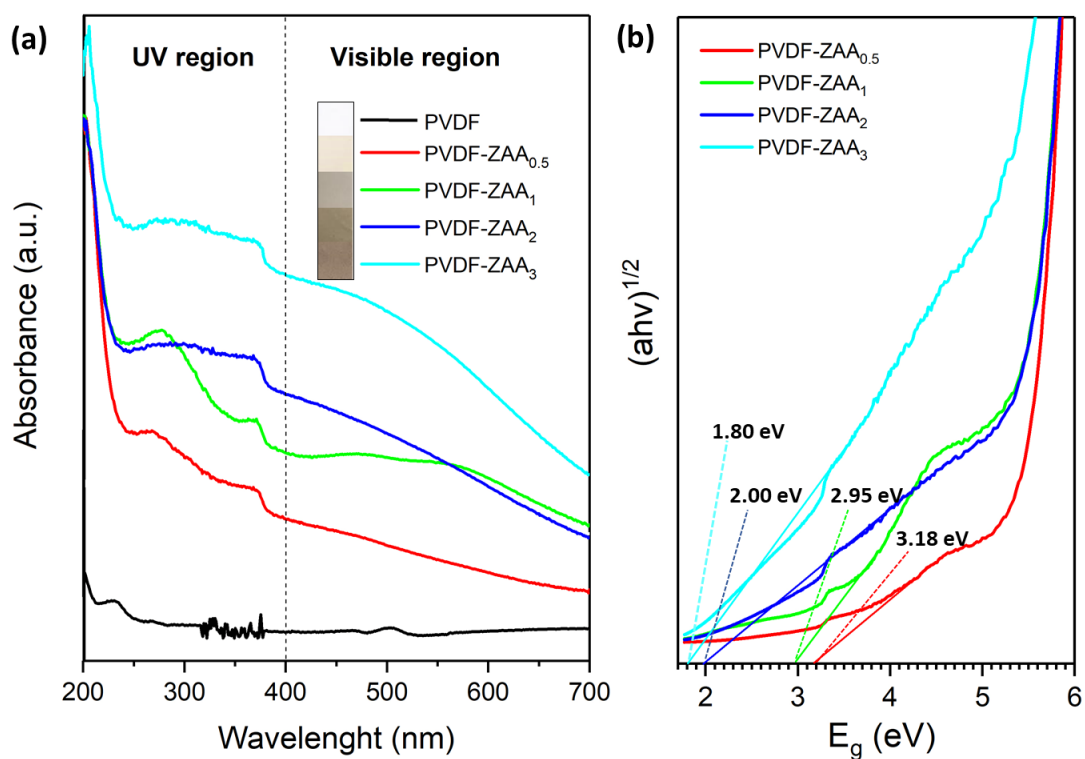

**Figure S2.** (a) UV-Vis absorption spectra for PVDF-ZAA membrane with different loading of ZnO/Ag<sub>2</sub>CO<sub>3</sub>/Ag<sub>2</sub>O. (b)  $(\alpha h\nu)^{1/2}$  versus vs the energy of absorbed light affords the band gaps of the different samples.

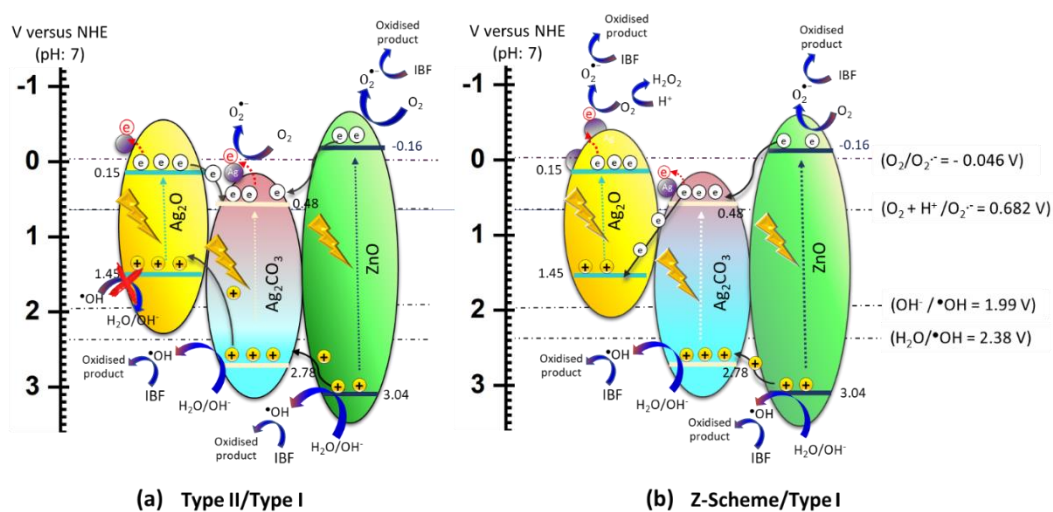

**Figure S3.** Schematic illustration for the photocatalytic reaction process of the ZnO/Ag<sub>2</sub>CO<sub>3</sub>/Ag<sub>2</sub>O heterostructures under LED light irradiation (a) Type II/Type I and (b) Z-scheme/Type I mechanism
